# Supplementary material for: Predicting the coordination geometry for Mg2+in the p53 DNA-binding domain: insights from computational studies
Source: Royal Society of Chemistry journal article supplement (doi:10.1039/c0cp00678e), 2010-11-15
Supplement: c0cp00678e.pdf [file c0cp00678e.pdf]

Supplementary Information for:

## Predicting the coordination geometry for $Mg^{2+}$ in p53

### DNA-binding domain: Insights from computational studies

Teng Wang,<sup>a</sup> Xueguang Shao,<sup>a</sup> Wensheng Cai,<sup>\*a</sup> Yonglai Xue,<sup>b</sup> Shuai Wang,<sup>b</sup> Xizeng Feng<sup>b</sup>

<sup>a</sup> College of Chemistry, Nankai University, Tianjin, 300071, P.R. China.  
E-mail: wscai@nankai.edu.cn

<sup>b</sup> College of Life Science, Nankai University, Tianjin, 300071, P.R. China.

**Table S1** The second-order perturbation energies  $E(2)$  (kcal mol<sup>-1</sup>) from NBO

| Donor NBO (i) | Acceptor NBO (j)                               | $E(2)$ |
|---------------|------------------------------------------------|--------|
|               | $Zn^{2+} \cdot Cys^{-3} \cdot His$             |        |
| LP (3) S1     | RY*(1)Zn                                       | 12.20  |
| LP (3) S1     | BD*(1) S2-Zn                                   | 17.99  |
| LP (3) S1     | BD*(1) S3-Zn                                   | 19.24  |
| BD (1) S2-Zn  | BD*(1) S3-Zn                                   | 31.81  |
| BD (1) S3-Zn  | BD*(1) S2-Zn                                   | 29.23  |
|               | $Mg^{2+} \cdot Cys^{-3} \cdot His$             |        |
| LP (3) S1     | LP*(1)Mg                                       | 51.33  |
| LP (1) N      | LP*(1)Mg                                       | 19.96  |
| LP (3) S2     | LP*(1)Mg                                       | 52.24  |
| LP (3) S3     | LP*(1)Mg                                       | 48.43  |
|               | $Mg^{2+} \cdot Cys^{-3} \cdot His \cdot W_2-B$ |        |
| LP (3) S1     | LP*(1)Mg                                       | 43.36  |
| LP (1) N      | LP*(1)Mg                                       | 19.05  |
| LP (3) S2     | LP*(1)Mg                                       | 37.02  |
| LP (2) S3     | LP*(1)Mg                                       | 18.27  |
| LP (3) S3     | LP*(1)Mg                                       | 15.85  |
| LP (2) O1     | LP*(1)Mg                                       | 13.40  |
| LP (2) O2     | LP*(1)Mg                                       | 12.08  |

| $\text{Mg}^{2+}\cdot\text{Cys}_3\cdot\text{His}$                         |          |       |
|--------------------------------------------------------------------------|----------|-------|
| LP (2) S1                                                                | LP*(1)Mg | 39.66 |
| LP (1) N                                                                 | LP*(1)Mg | 27.99 |
| LP (2) S2                                                                | LP*(1)Mg | 41.66 |
| LP (2) S3                                                                | LP*(1)Mg | 39.91 |
| $\text{Mg}^{2+}\cdot\text{Cys}_3\cdot\text{His}\cdot\text{W}_2\text{-B}$ |          |       |
| LP (2) S1                                                                | LP*(1)Mg | 30.45 |
| LP (1) N                                                                 | LP*(1)Mg | 25.41 |
| LP (2) S2                                                                | LP*(1)Mg | 31.96 |
| LP (2) S3                                                                | LP*(1)Mg | 28.56 |
| LP (2) O2                                                                | LP*(1)Mg | 17.63 |
| LP (2) O1                                                                | LP*(1)Mg | 17.98 |
| $\text{Mg}^{2+}\cdot\text{Cys}_2\cdot\text{His}\cdot\text{W}_3$          |          |       |
| LP (2) S1                                                                | LP*(1)Mg | 33.39 |
| LP (1) N                                                                 | LP*(1)Mg | 25.30 |
| LP (2) S2                                                                | LP*(1)Mg | 27.47 |
| LP (2) O3                                                                | LP*(1)Mg | 18.46 |
| LP (2) O1                                                                | LP*(1)Mg | 18.91 |
| LP (2) O2                                                                | LP*(1)Mg | 18.10 |
| $\text{Mg}^{2+}\cdot\text{Cys}^-\cdot\text{His}\cdot\text{W}_3$          |          |       |
| LP (2) S1                                                                | LP*(1)Mg | 10.66 |
| LP (3) S1                                                                | LP*(1)Mg | 34.83 |
| LP (1) N                                                                 | LP*(1)Mg | 25.47 |
| LP (3) S2                                                                | LP*(1)Mg | 43.27 |
| LP (2) O3                                                                | LP*(1)Mg | 14.96 |
| LP (2) O2                                                                | LP*(1)Mg | 17.16 |
| LP (2) O1                                                                | LP*(1)Mg | 16.79 |
| $\text{Mg}^{2+}\cdot\text{Cys}^-\cdot\text{W}_4$                         |          |       |
| LP (3) S2                                                                | LP*(1)Mg | 51.66 |
| LP (3) S1                                                                | LP*(1)Mg | 41.51 |

|                                                                                  |          |       |
|----------------------------------------------------------------------------------|----------|-------|
| LP (2) O1                                                                        | LP*(1)Mg | 18.03 |
| LP (2) O3                                                                        | LP*(1)Mg | 17.93 |
| LP (2) O4                                                                        | LP*(1)Mg | 16.13 |
| LP (2) O2                                                                        | LP*(1)Mg | 16.98 |
| $\text{Mg}^{2+}\cdot\text{Cys}^-\cdot\text{His}\cdot\text{W}_4$                  |          |       |
| LP (1) N                                                                         | LP*(1)Mg | 24.85 |
| LP (3) S1                                                                        | LP*(1)Mg | 48.51 |
| LP (2) O4                                                                        | LP*(1)Mg | 19.41 |
| LP (2) O1                                                                        | LP*(1)Mg | 17.05 |
| LP (2) O3                                                                        | LP*(1)Mg | 21.43 |
| LP (2) O2                                                                        | LP*(1)Mg | 18.45 |
| $\text{Mg}^{2+}\cdot\text{Cys}\cdot\text{Cys}^-\cdot\text{His}\cdot\text{W}_3$   |          |       |
| LP (2) S1                                                                        | LP*(1)Mg | 27.89 |
| LP (1) N                                                                         | LP*(1)Mg | 24.81 |
| LP (3) S2                                                                        | LP*(1)Mg | 47.75 |
| LP (2) O3                                                                        | LP*(1)Mg | 17.25 |
| LP (2) O2                                                                        | LP*(1)Mg | 17.80 |
| LP (2) O1                                                                        | LP*(1)Mg | 18.44 |
| $\text{Mg}^{2+}\cdot\text{Cys}_2\cdot\text{Cys}^-\cdot\text{His}$                |          |       |
| LP (2) S1                                                                        | LP*(1)Mg | 34.48 |
| LP (1) N                                                                         | LP*(1)Mg | 26.29 |
| LP (2) S2                                                                        | LP*(1)Mg | 33.43 |
| LP (3) S3                                                                        | LP*(1)Mg | 72.24 |
| $\text{Mg}^{2+}\cdot\text{Cys}_2\cdot\text{Cys}^-\cdot\text{His}\cdot\text{W}_2$ |          |       |
| LP (2) S1                                                                        | LP*(1)Mg | 28.40 |
| LP (1) N                                                                         | LP*(1)Mg | 24.14 |
| LP (2) S2                                                                        | LP*(1)Mg | 28.42 |
| LP (3) S3                                                                        | LP*(1)Mg | 44.91 |
| LP (2) O1                                                                        | LP*(1)Mg | 15.66 |
| LP (2) O2                                                                        | LP*(1)Mg | 16.36 |

BD denotes bonding orbital; BD\* denotes antibonding orbital; LP denotes lone pair; LP\* denotes unoccupied orbital. For LP, (1), (2) and (3) denote the first, the second and the third lone pair electron, respectively. RY\* denotes Rydberg orbital.

---

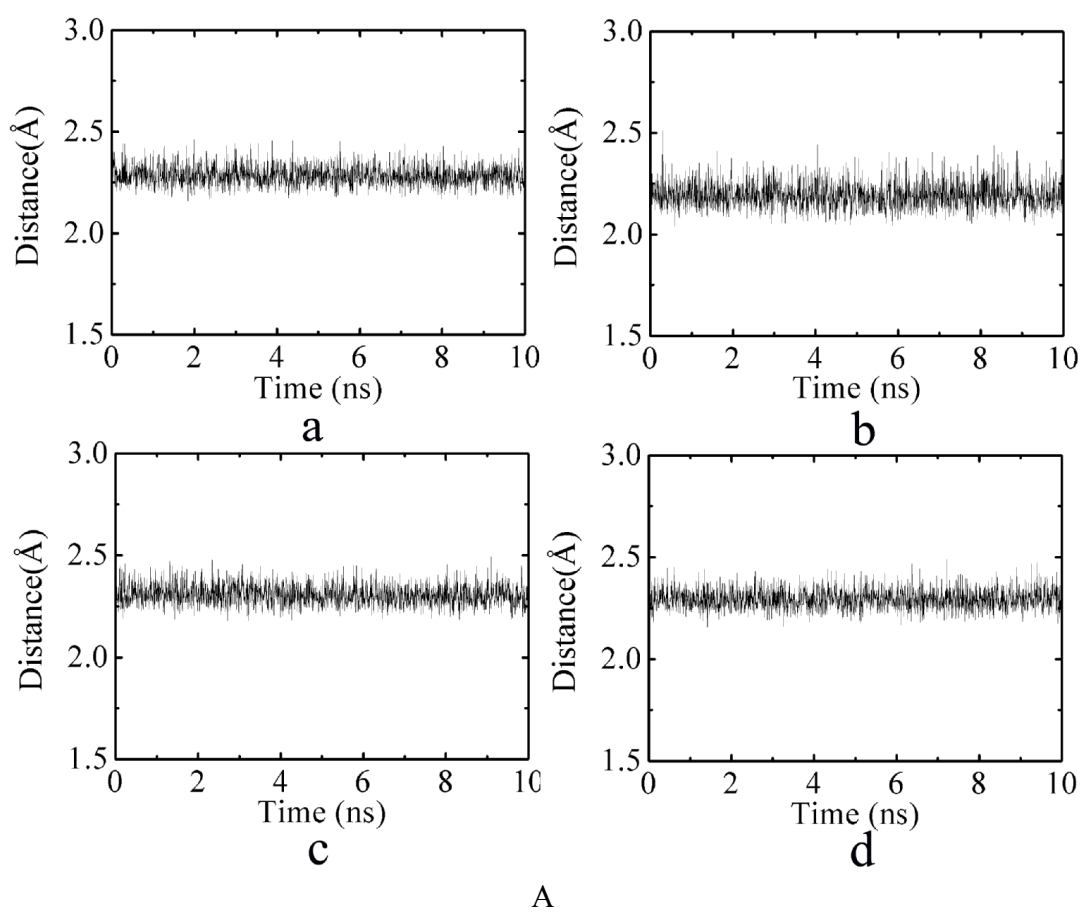

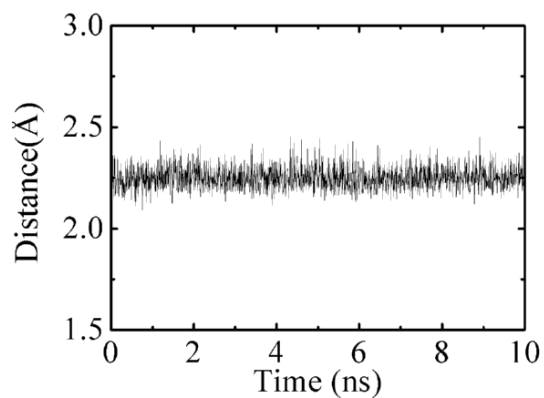

**a**

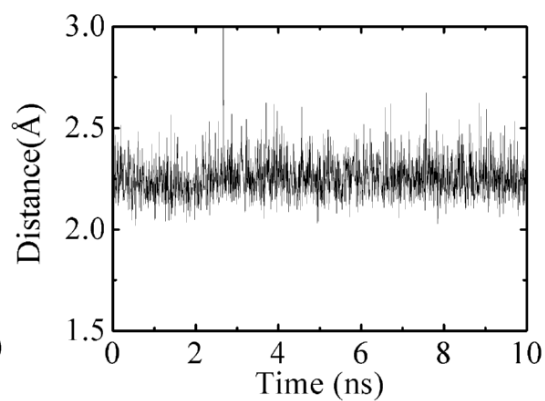

**b**

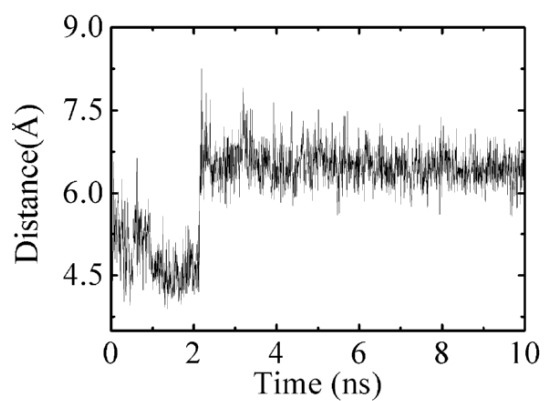

**c**

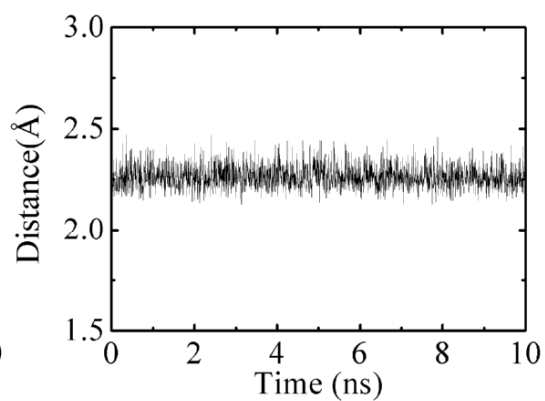

**d**

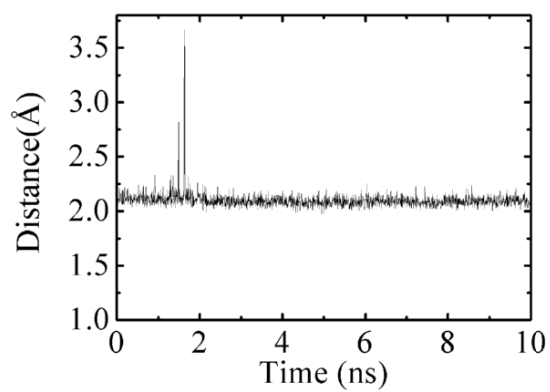

**e**

**B**

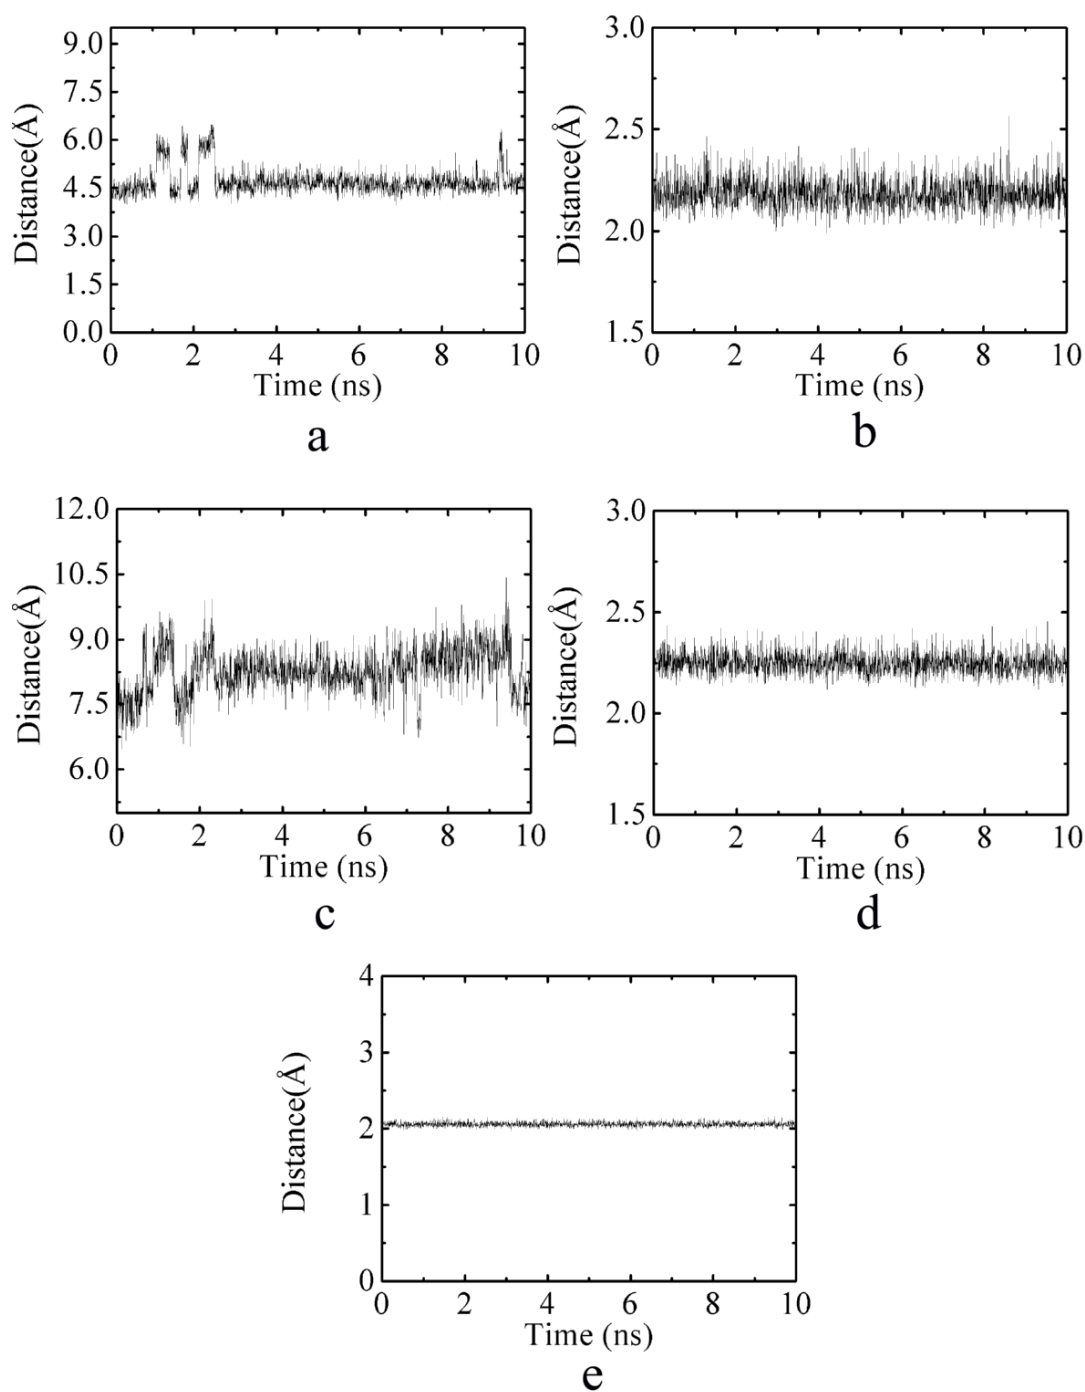

C

**Fig. S1** (a) Time evolution of the distance between the metal ion and the S<sub>γ</sub> atom of Cys176.

(b) Time evolution of the distance between the metal ion and the N<sub>δ1</sub> atom of His179.

(c) Time evolution of the distance between the metal ion and the S<sub>γ</sub> atom of Cys238.

(d) Time evolution of the distance between the metal ion and the S<sub>γ</sub> atom of Cys242.

(e) Time evolution of the average distance between the metal ion and the oxygen atoms of water molecules.

(A) Zn<sup>2+</sup>-p53DBD. (B) Mg<sup>2+</sup>-p53DBD (1H). (C) Mg<sup>2+</sup>-p53DBD (2H).

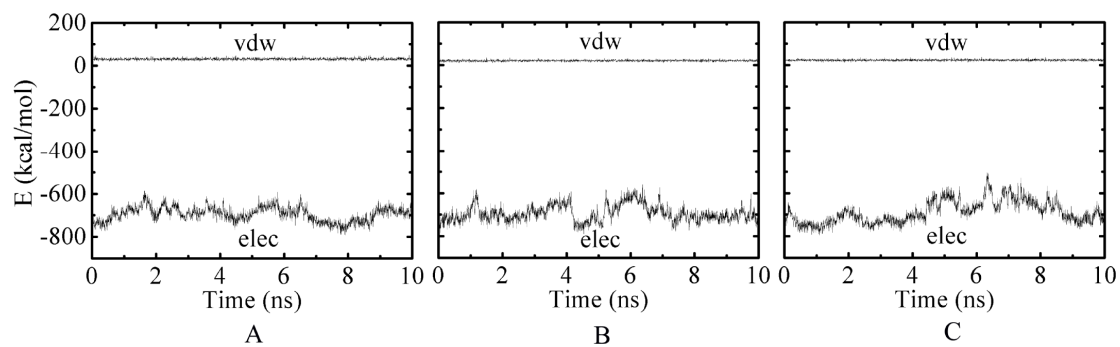

**Fig. S2** Interaction energy between the metal ion and all the other atoms (protein and water) in (A) Zn<sup>2+</sup>-p53DBD. (B) Mg<sup>2+</sup>-p53DBD (1H). (C) Mg<sup>2+</sup>-p53DBD (2H).
